# Supplementary material for: Migration of Dihydroxy Alkylamines and Their Possible Impurities from Packaging into Foods and Food Simulants: Analysis and Safety Evaluation
Source: MDPI journal article supplement (doi:10.3390/polym15122656), 2023-06-12
Supplement: s1 [file s1]

## **Polymers**

### **Electronic Supplementary Material**

#### **Migration of dihydroxy alkylamines and its possible impurities from packaging into foods and food simulants: Analysis and safety evaluation**

Antía Lestido-Cardama, Letricia Barbosa-Pereira, Raquel Sendón, Perfecto Paseiro Losada and Ana Rodríguez Bernaldo de Quirós

## LC-MS/MS chromatograms of material samples, S4-S8 and S10-S12

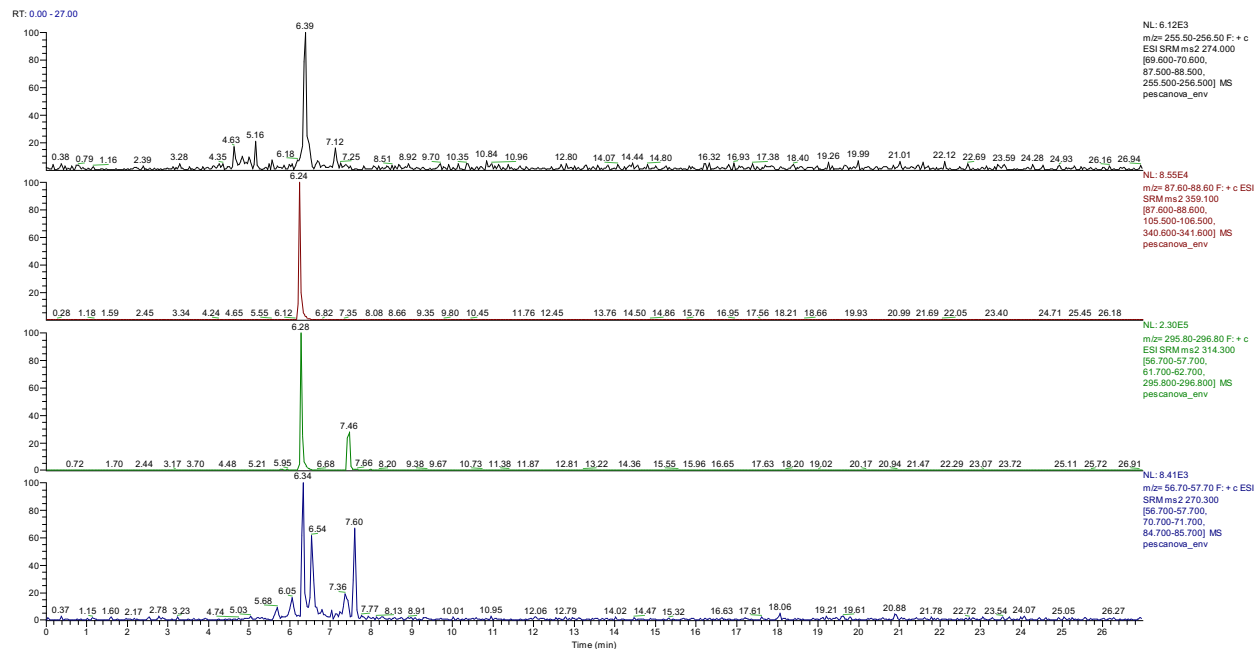

**Figure S1.-** LC-MS/MS chromatograms for ethanol extract of S4 packaging: (A) the transition for N,N-Bis(2-hydroxyethyl)dodecylamine (retention time: 5.16 min), (B) stearyldiethanolamine, (C) 2-(octadecylamino)ethanol and (D) octadecylamine.

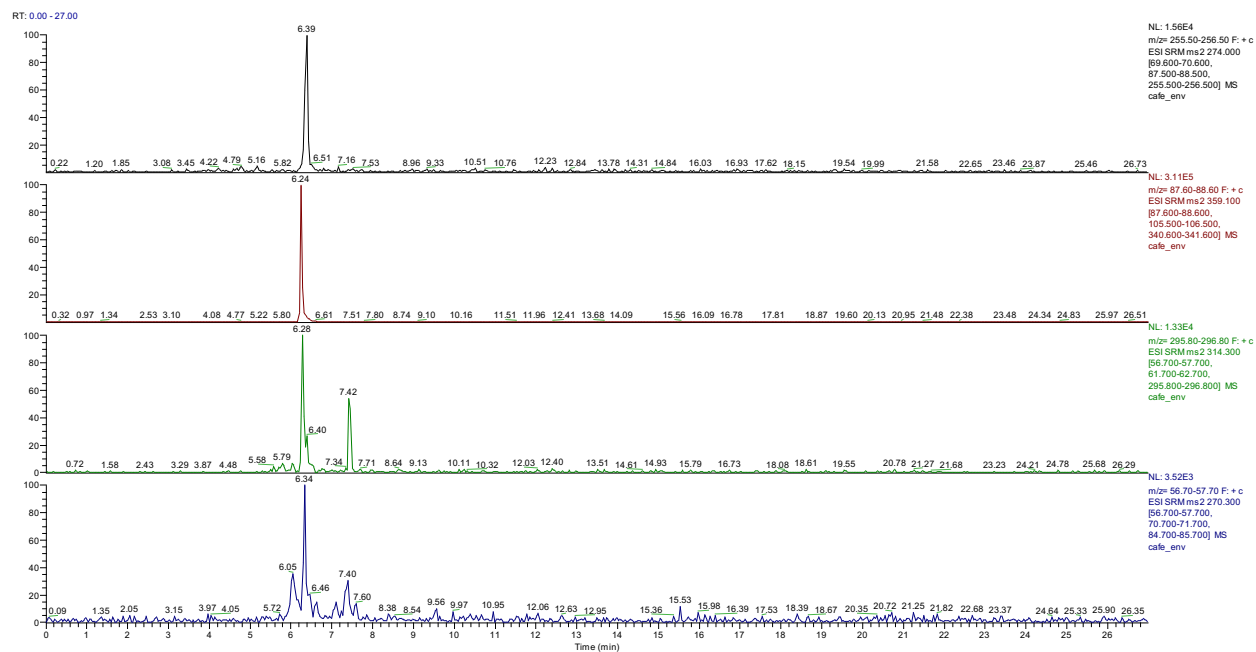

**Figure S2.-** LC-MS/MS chromatograms for ethanol extract of S5 packaging: (A) the transition for N,N-Bis(2-hydroxyethyl)dodecylamine (retention time: 5.16 min), (B) stearyldiethanolamine, (C) 2-(octadecylamino)ethanol and (D) octadecylamine.

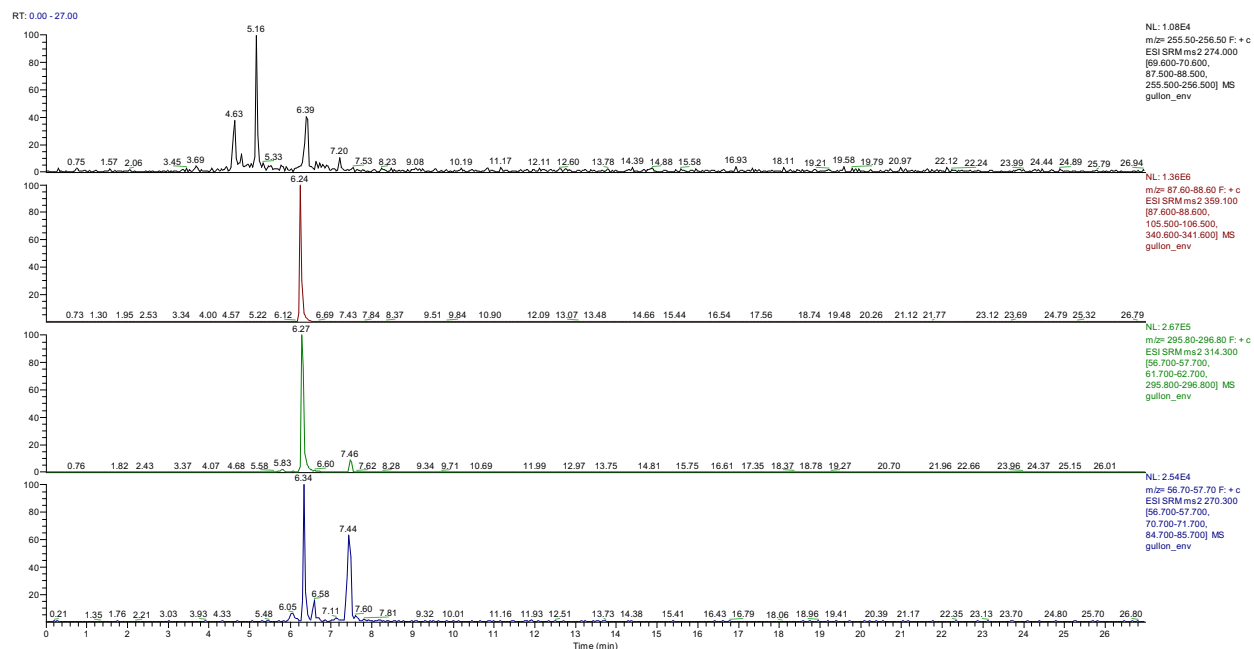

**Figure S3.-** LC-MS/MS chromatograms for ethanol extract of S6 packaging: (A) the transition for N,N-Bis(2-hydroxyethyl)dodecylamine (retention time: 5.16 min), (B) stearyldiethanolamine, (C) 2-(octadecylamino)ethanol and (D) octadecylamine.

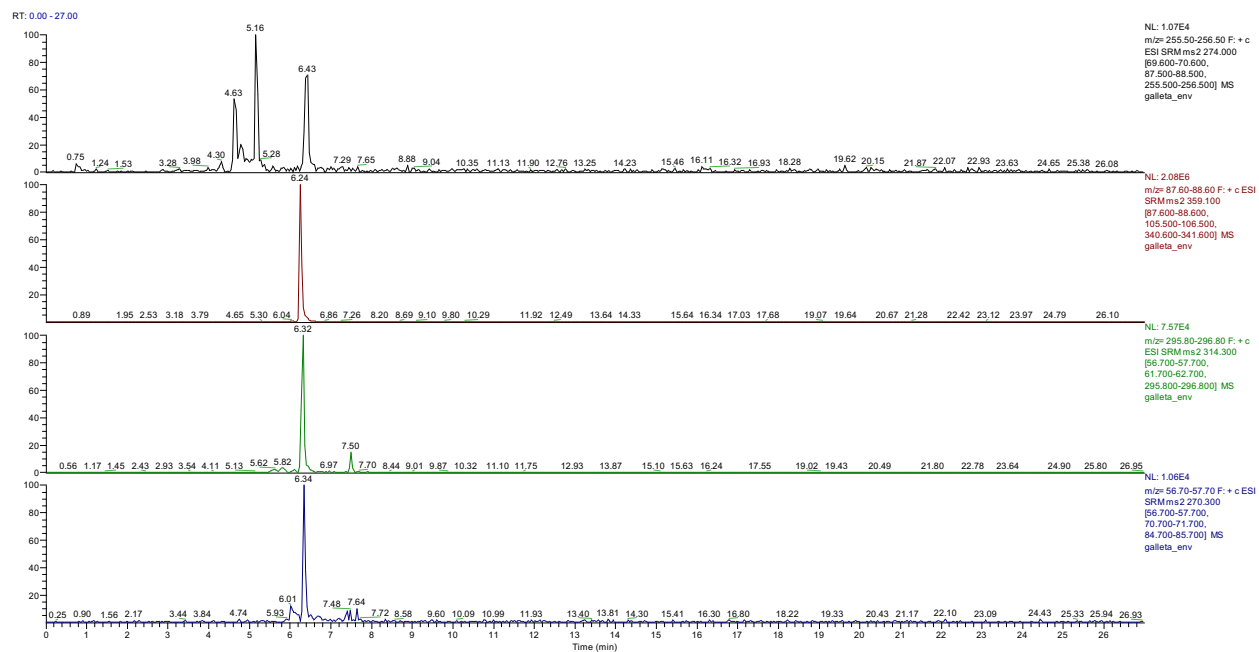

**Figure S4.-** LC-MS/MS chromatograms for ethanol extract of S7 packaging: (A) the transition for N,N-Bis(2-hydroxyethyl)dodecylamine (retention time: 5.16 min), (B) stearyldiethanolamine, (C) 2-(octadecylamino)ethanol and (D) octadecylamine.

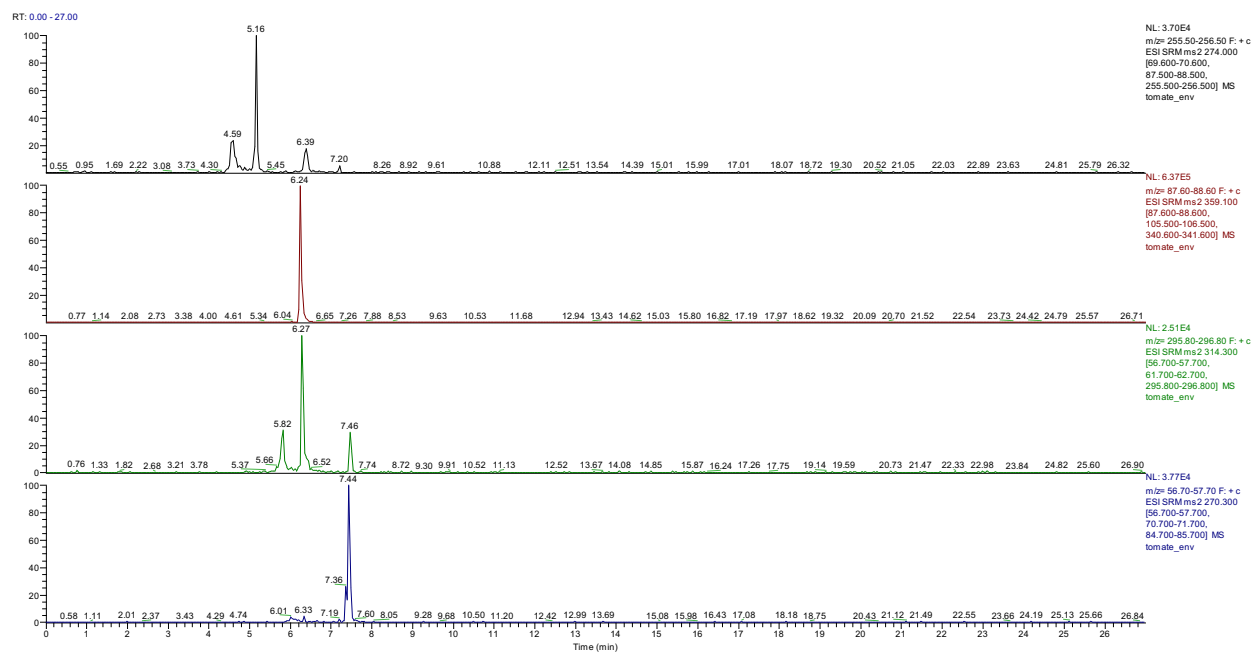

**Figure S5.-** LC-MS/MS chromatograms for ethanol extract of S8 packaging: (A) the transition for N,N-Bis(2-hydroxyethyl)dodecylamine (retention time: 5.16 min), (B) stearyldiethanolamine, (C) 2-(octadecylamino)ethanol and (D) octadecylamine.

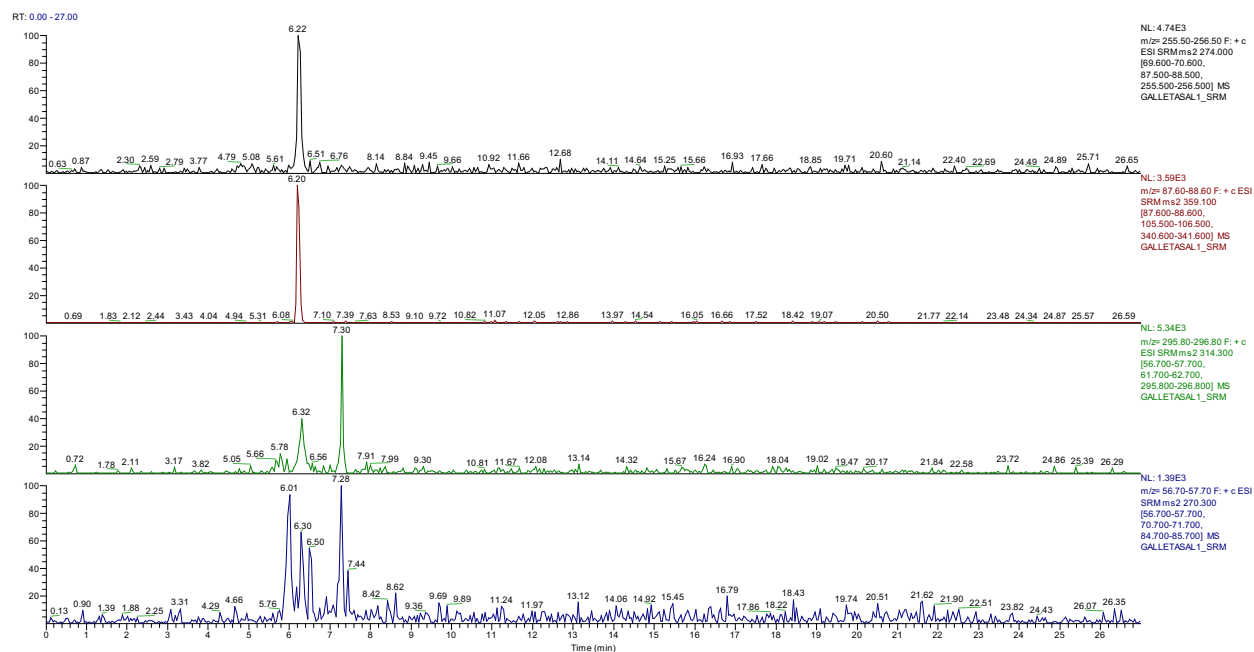

**Figure S6.-** LC-MS/MS chromatograms for ethanol extract of S11 packaging: (A) the transition for N,N-Bis(2-hydroxyethyl)dodecylamine (retention time: 5.16 min), (B) stearyl diethanolamine, (C) 2-(octadecylamino)ethanol and (D) octadecylamine.

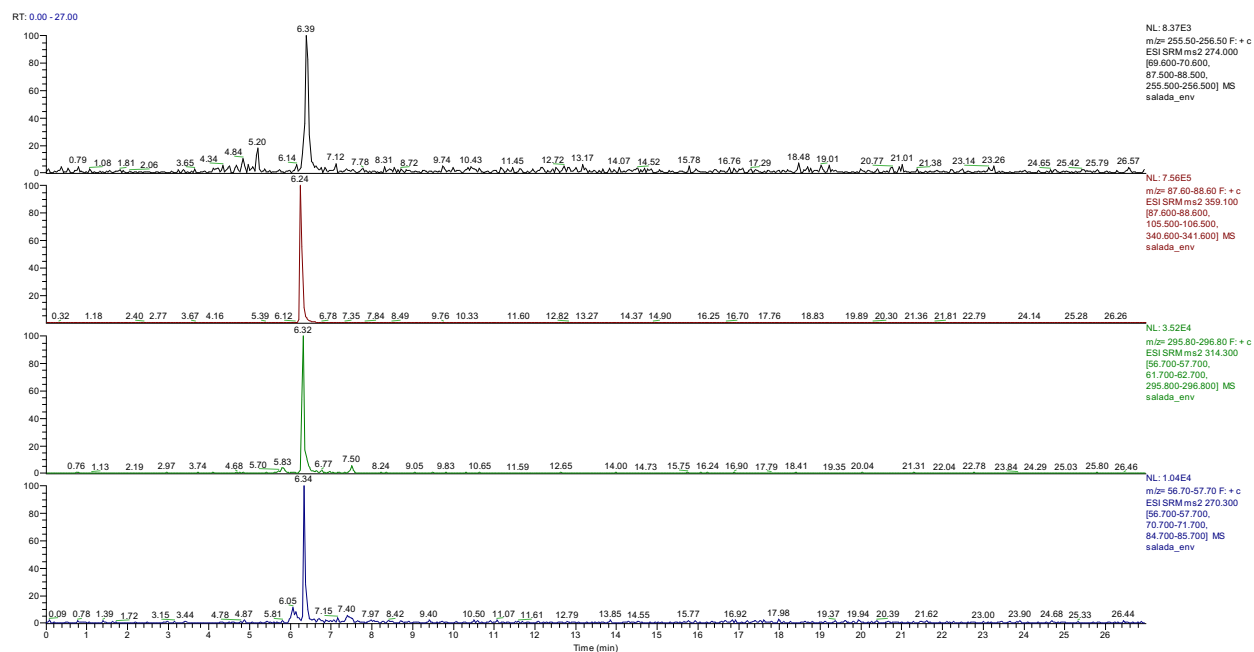

**Figure S7.-** LC-MS/MS chromatograms for ethanol extract of S12 packaging: (A) the transition for N,N-Bis(2-hydroxyethyl)dodecylamine (retention time: 5.16 min), (B) stearyl diethanolamine, (C) 2-(octadecylamino)ethanol and (D) octadecylamine.
